# Supplementary material
Source: publisher figshare collection journal article supplement (https://tandf.figshare.com/ndownloader/files/21005427)
Supplement: Supplementary file 1 [file 21005427]

Supplementary material

Groundwater storage change from *in situ* and GRACE-based estimates in major river basins across India

Soumendra N. Bhanja1†, Abhijit Mukherjee1,2, Matthew Rodell3

**Table S1.** Datasets used in the study.

| Parameter | Data source | Spatial resolution | Temporal resolution |
| --- | --- | --- | --- |
| Precipitation | India Meteorological Department (IMD) precipitation data (IMD4) | Gridded (0.25º × 0.25º) | Daily |
| Groundwater level | Central Groundwater Board (CGWB), India | Point | Quarterly |
| Terrestrial water storage (TWS) | GRACE, Spherical harmonics solution from NASA JPL | Gridded (1º × 1º) | Monthly |
| Terrestrial water storage (TWS) | GRACE, Mascon solution from NASA JPL | Gridded (1º × 1º) | Monthly |
| Soil moisture | GLDAS (CLM, Noah, VIC) from NASA | Gridded (1º × 1º) | Monthly |
| Surface runoff | GLDAS (CLM, Noah, VIC) from NASA | Gridded (1º × 1º) | Monthly |


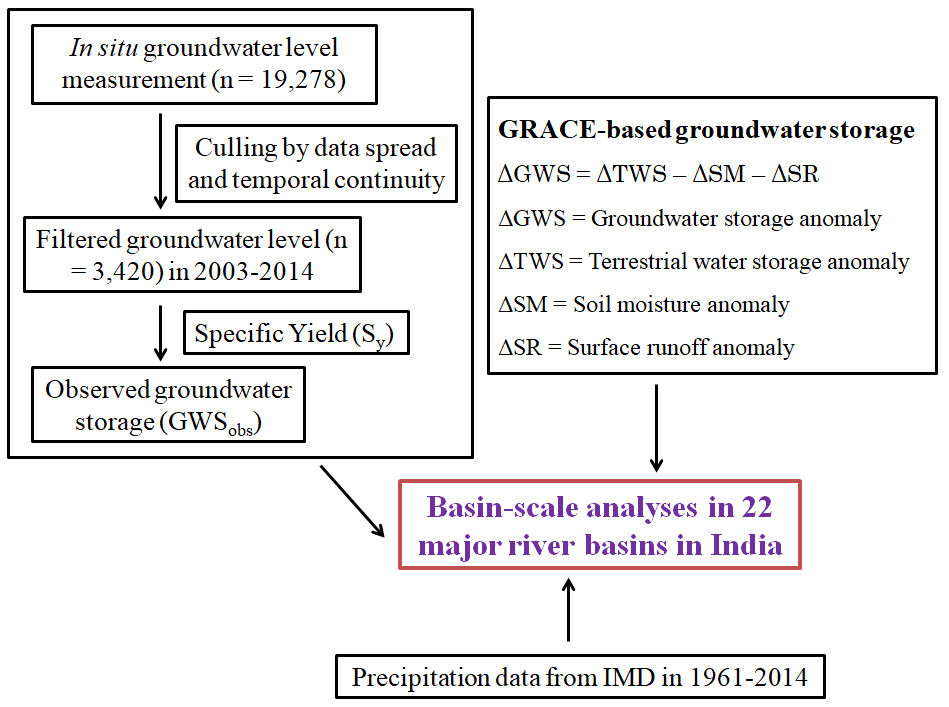


**Figure S1.** Flowchart showing the methodology adopted in the study.


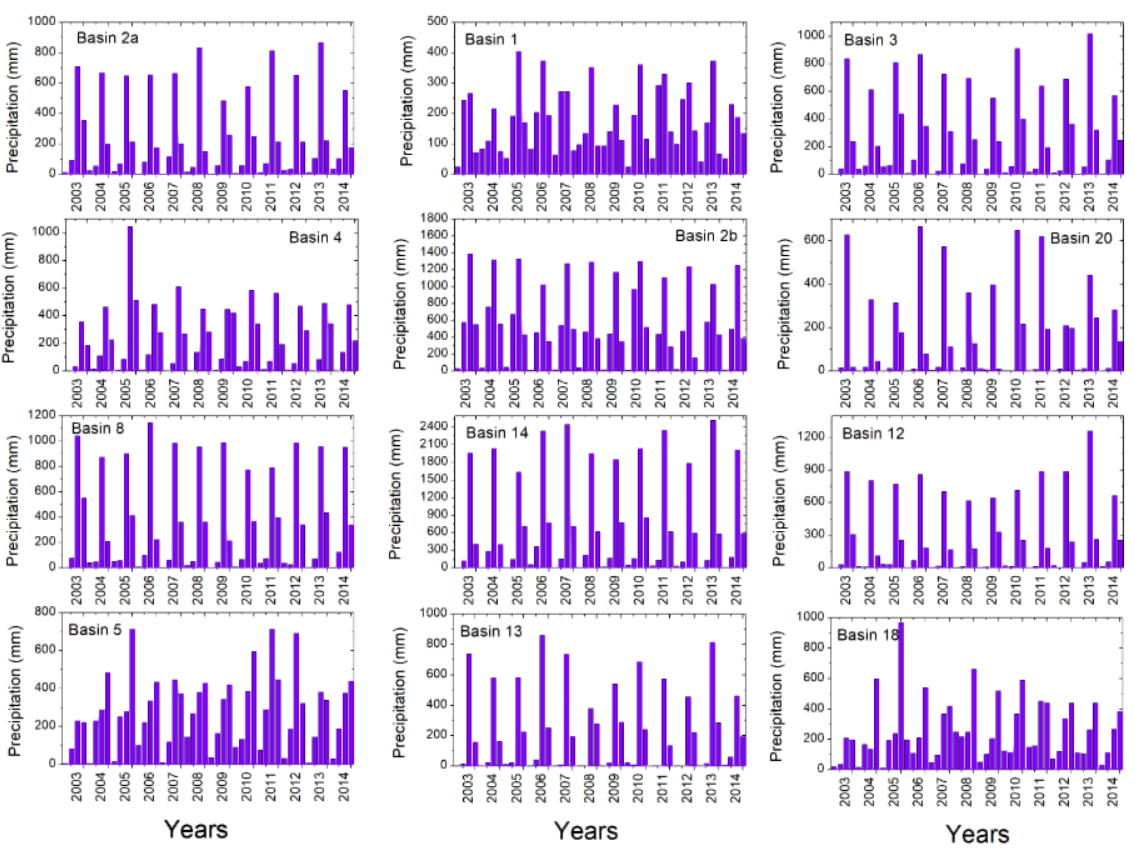


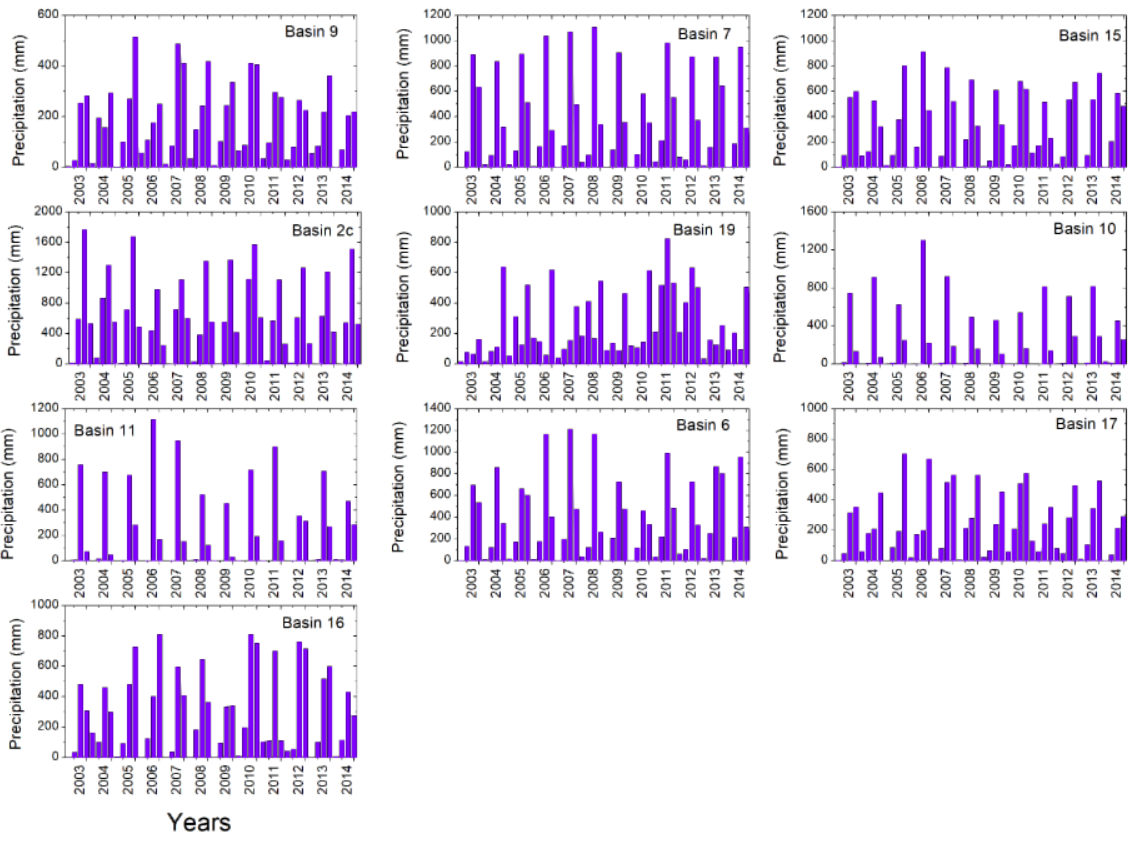


**Figure S2.** Basin-wise seasonal precipitation (mm). *x*-axis: seasons in 2003–2014 (four for each year). Basins are shown based on descending geographical area (N–S).


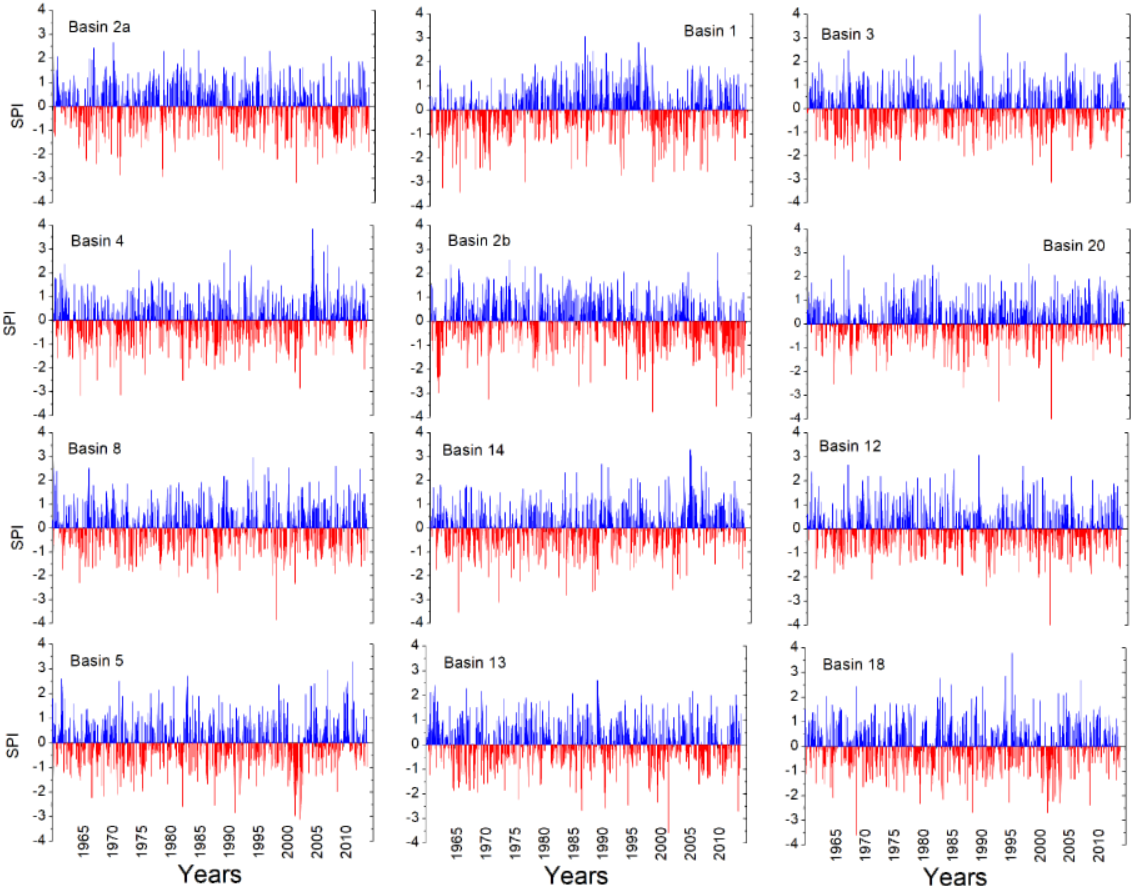


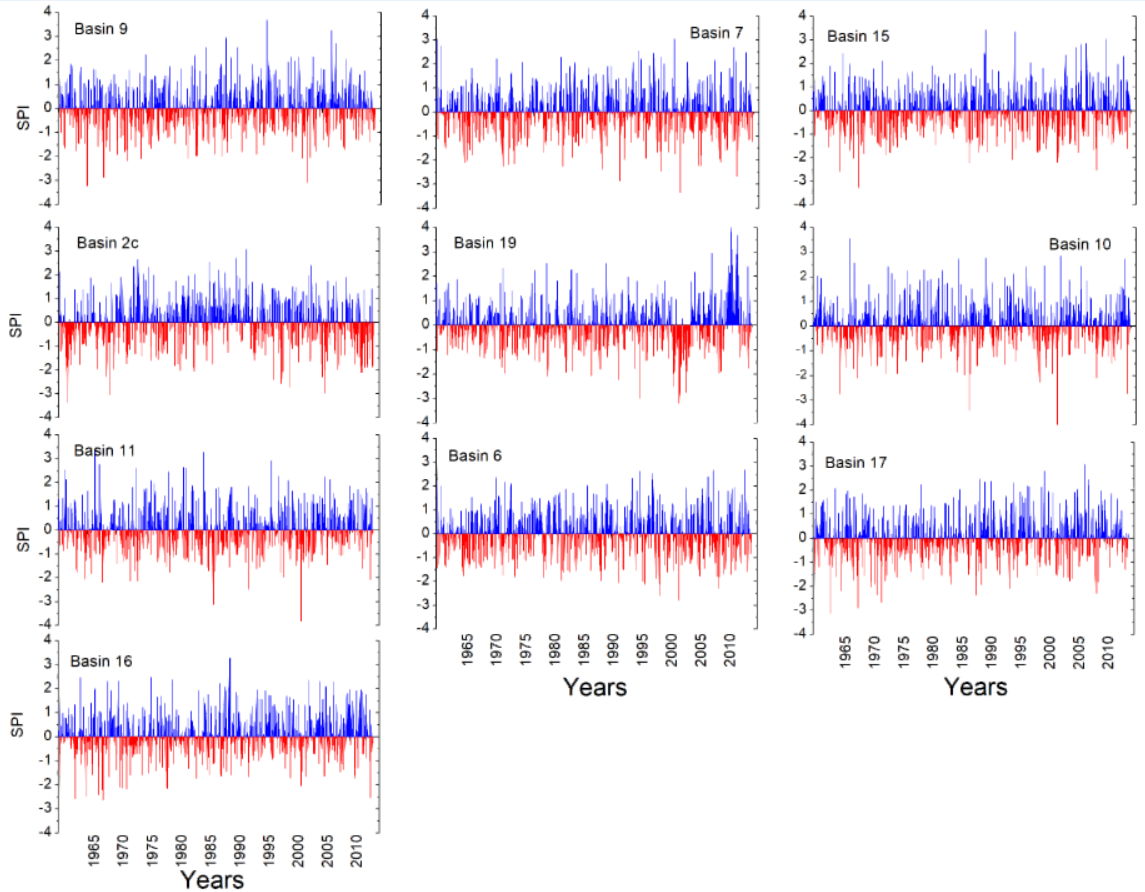


**Figure S3.** Basin-wise long-term (1961–2014) monthly SPI-1 values. Basins are shown based on descending geographical area.


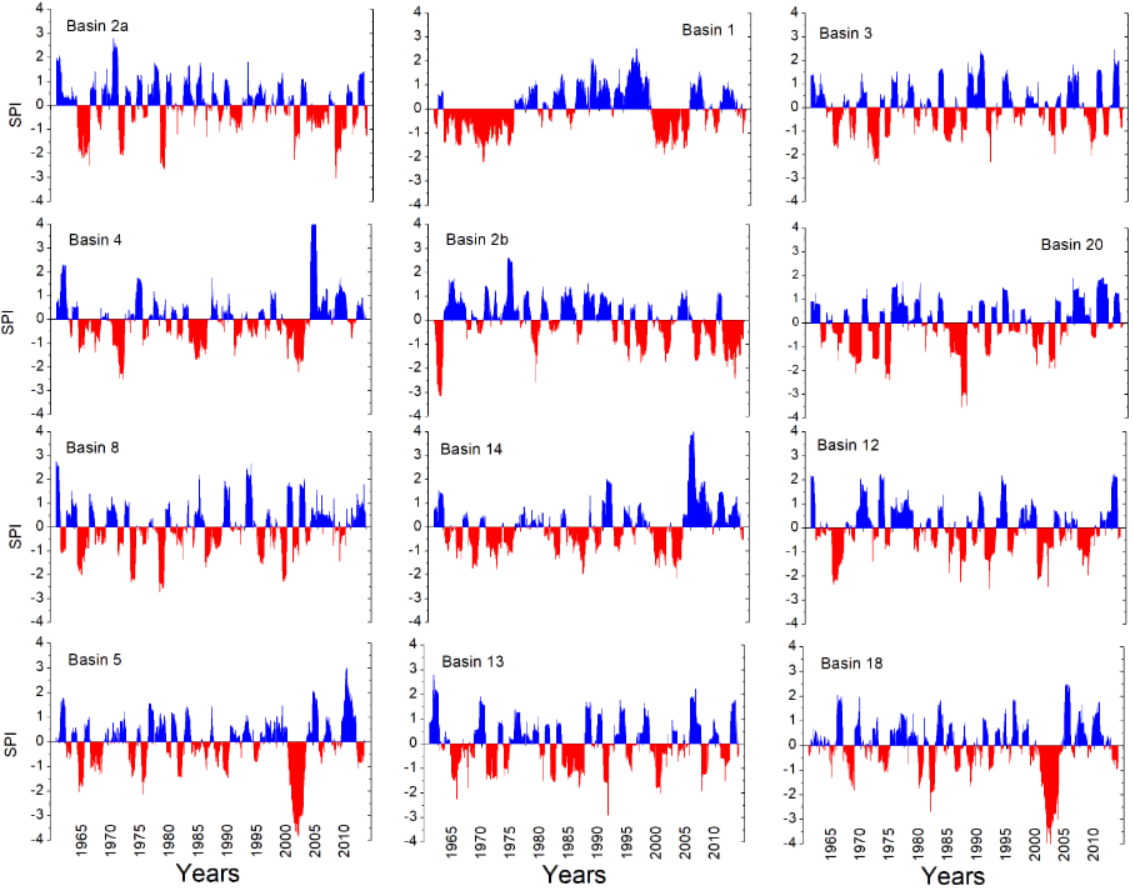


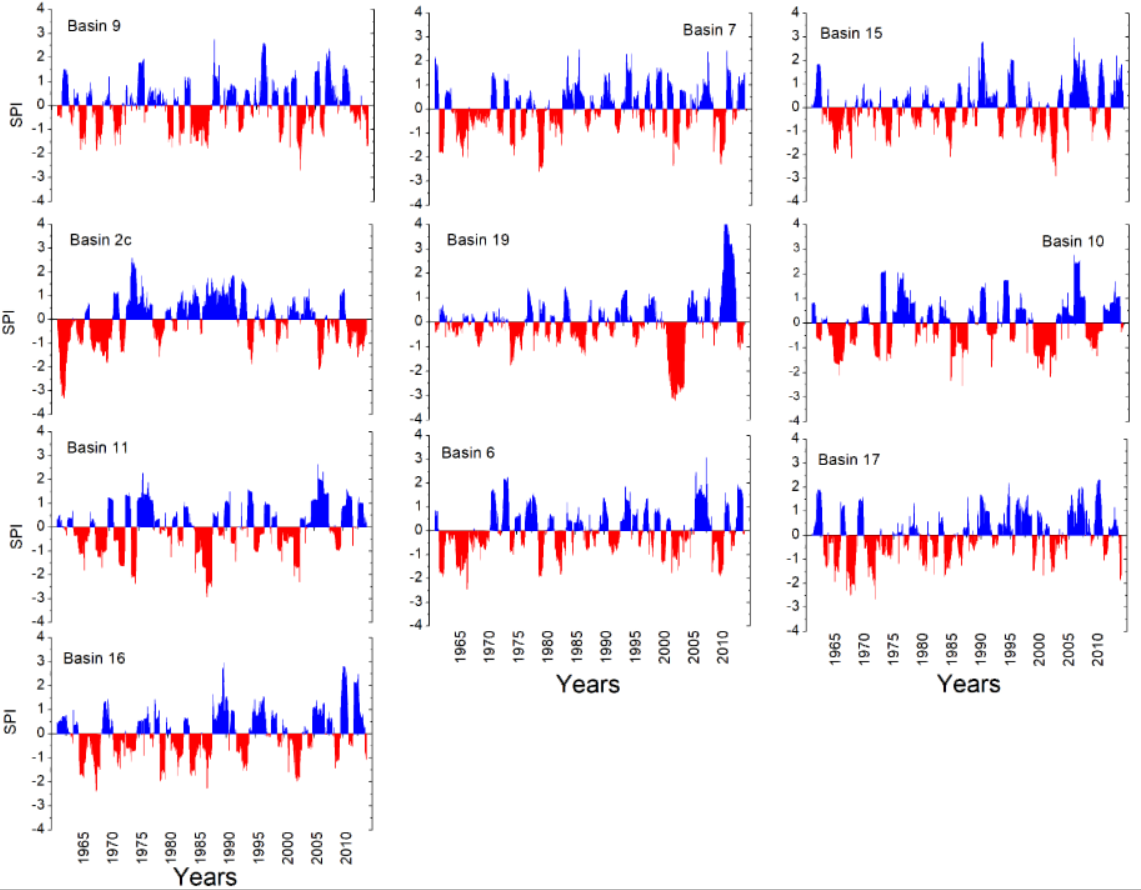
**Figure S4.** Basin-wise long-term (1961–2014) monthly SPI-12 values. Basins are shown based on descending geographical area.


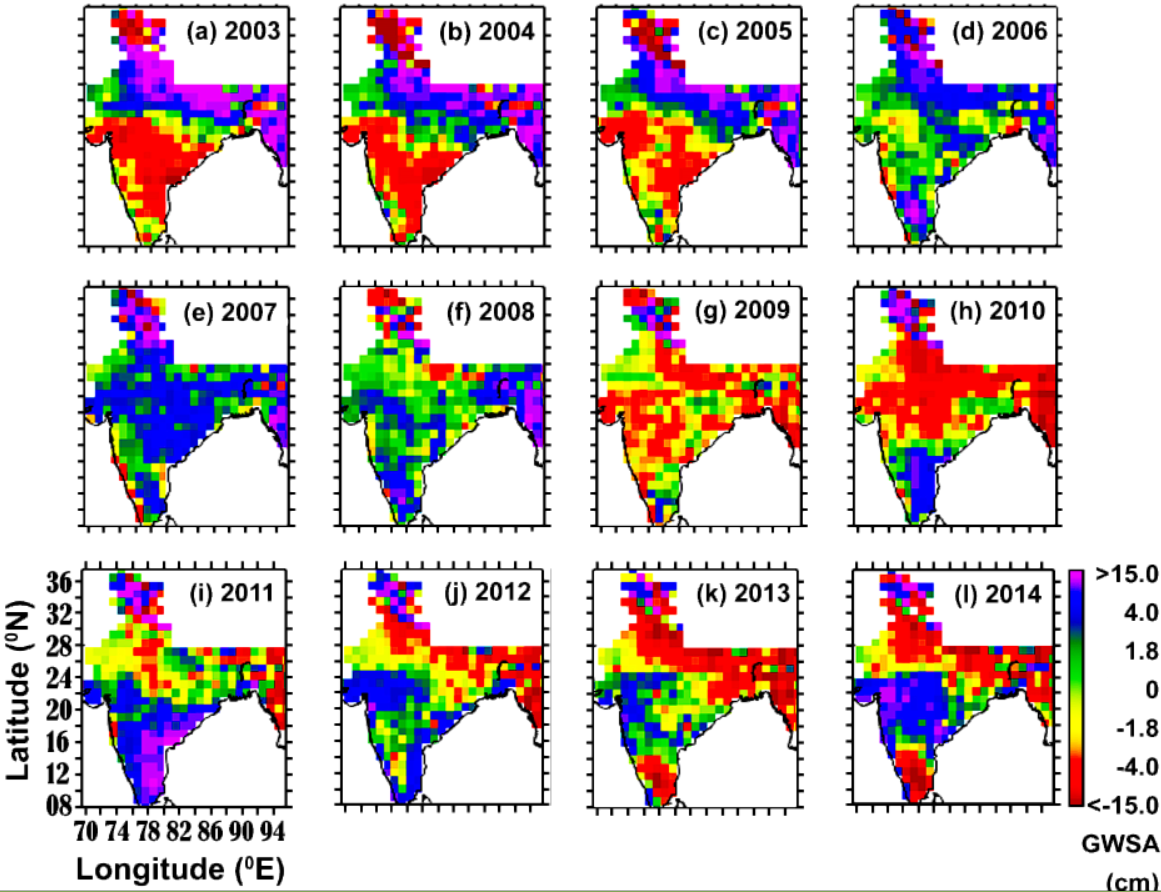


**Figure S5.** Annual satellite-based GWS anomalies (cm) using GRACE-SH data.


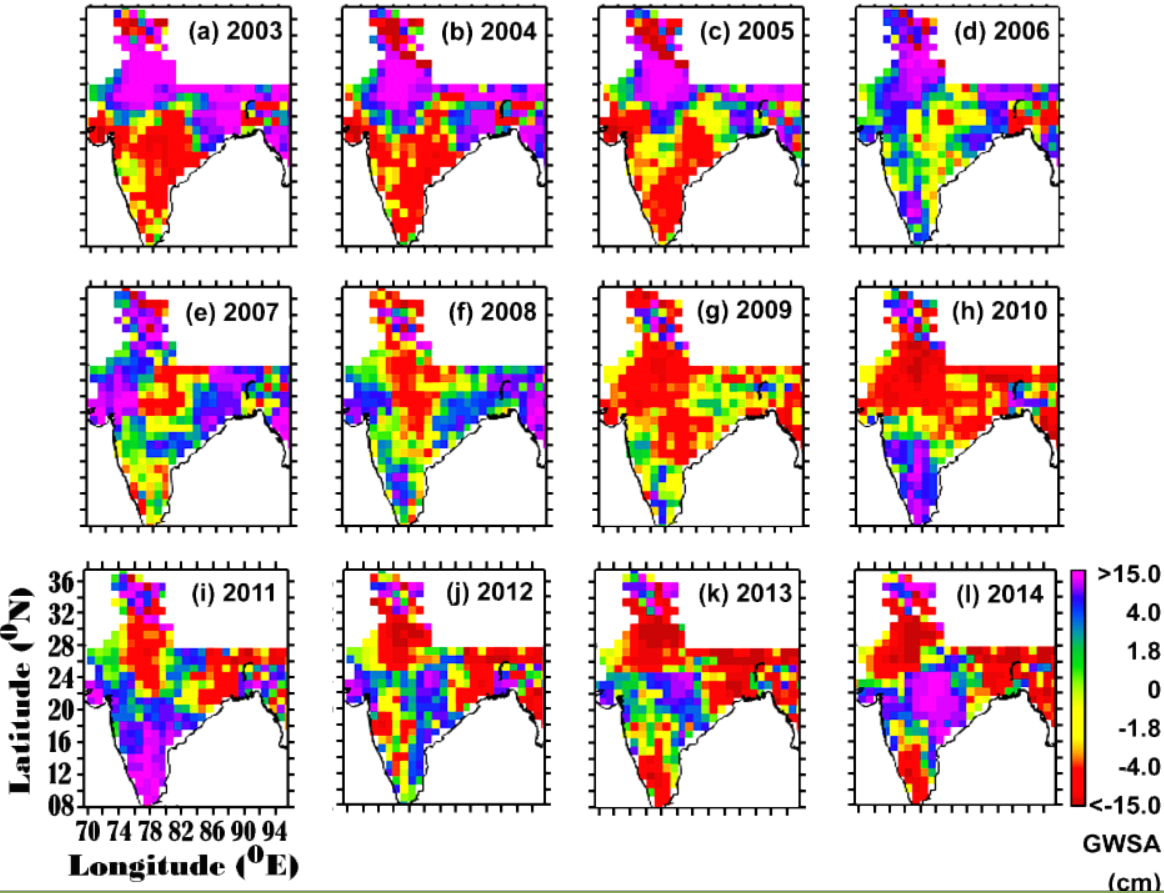


**Figure S6.** Annual satellite-based GWS anomalies (cm) using GRACE-MS data.
